# Supplementary material for: Difesa sostenibile, strada obbligata anche per i produttori convenzionali
Source: Royal Society of Chemistry journal article supplement (doi:10.1039/c8ra04422h), 2005-01-01
Supplement: c8ra04422h1.pdf [file c8ra04422h1.pdf]

## Electronic Supplementary Information

### **Bandgap Engineering of a Lead-free Defect Perovskite Cs<sub>3</sub>Bi<sub>2</sub>I<sub>9</sub> through Trivalent Doping of Ru<sup>3+</sup>**

Gu, Jinyu<sup>a,b</sup>, Yan, Gangbin<sup>a,b</sup>, Lian, Yuebin<sup>a,b</sup>, Mu, Qiaoqiao<sup>a,b</sup>, Jin,  
Huidong<sup>a,b</sup>, Deng, Zhao<sup>a,b\*</sup> and Peng, Yang<sup>a,b\*</sup>

<sup>a</sup> Soochow Institute for Energy and Materials Innovations, College of Physics, Optoelectronics and Energy & Collaborative Innovation Center of Suzhou Nano Science and Technology, Soochow University, Suzhou 215006, P. R. China.

<sup>b</sup> Key Laboratory of Advanced Carbon Materials and Wearable Energy Technologies of Jiangsu Province, Soochow University, Suzhou 215006, P. R. China.

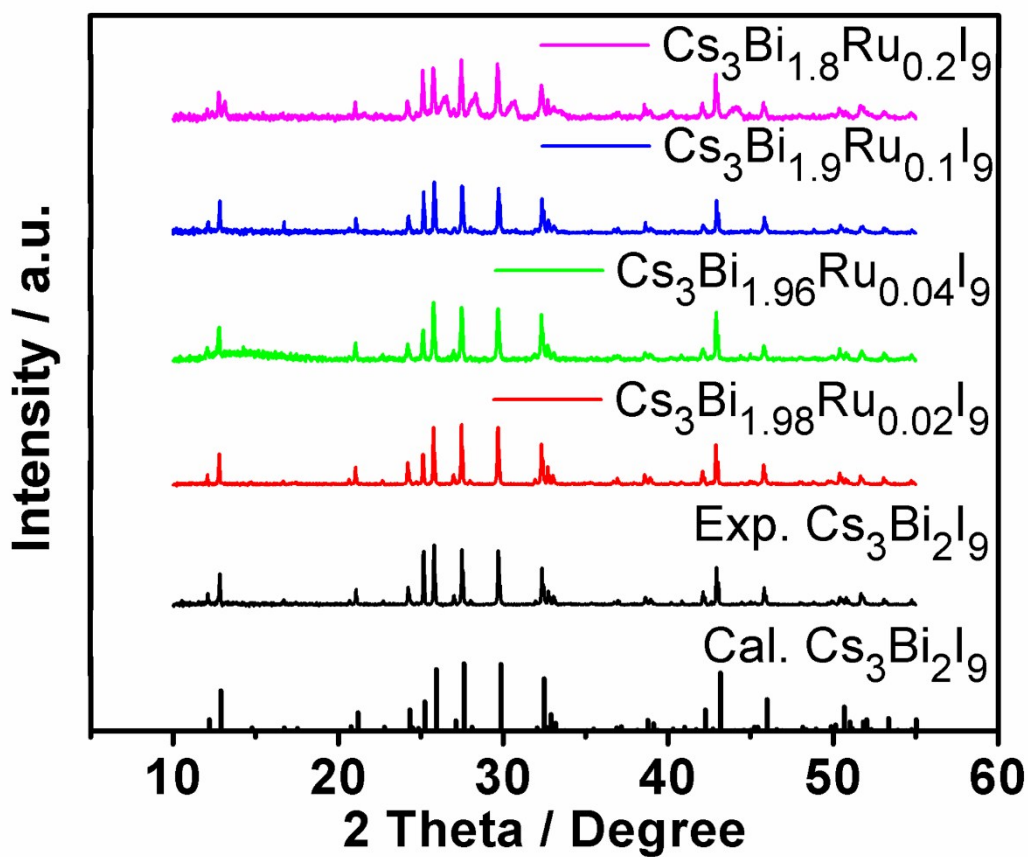

Figure S1. Powder XRD of  $\text{Cs}_3\text{Bi}_2\text{I}_9$  and  $\text{Cs}_3\text{Bi}_{2-x}\text{Ru}_x\text{I}_9$  with  $x = 0.02, 0.04, 0.1, 0.2$

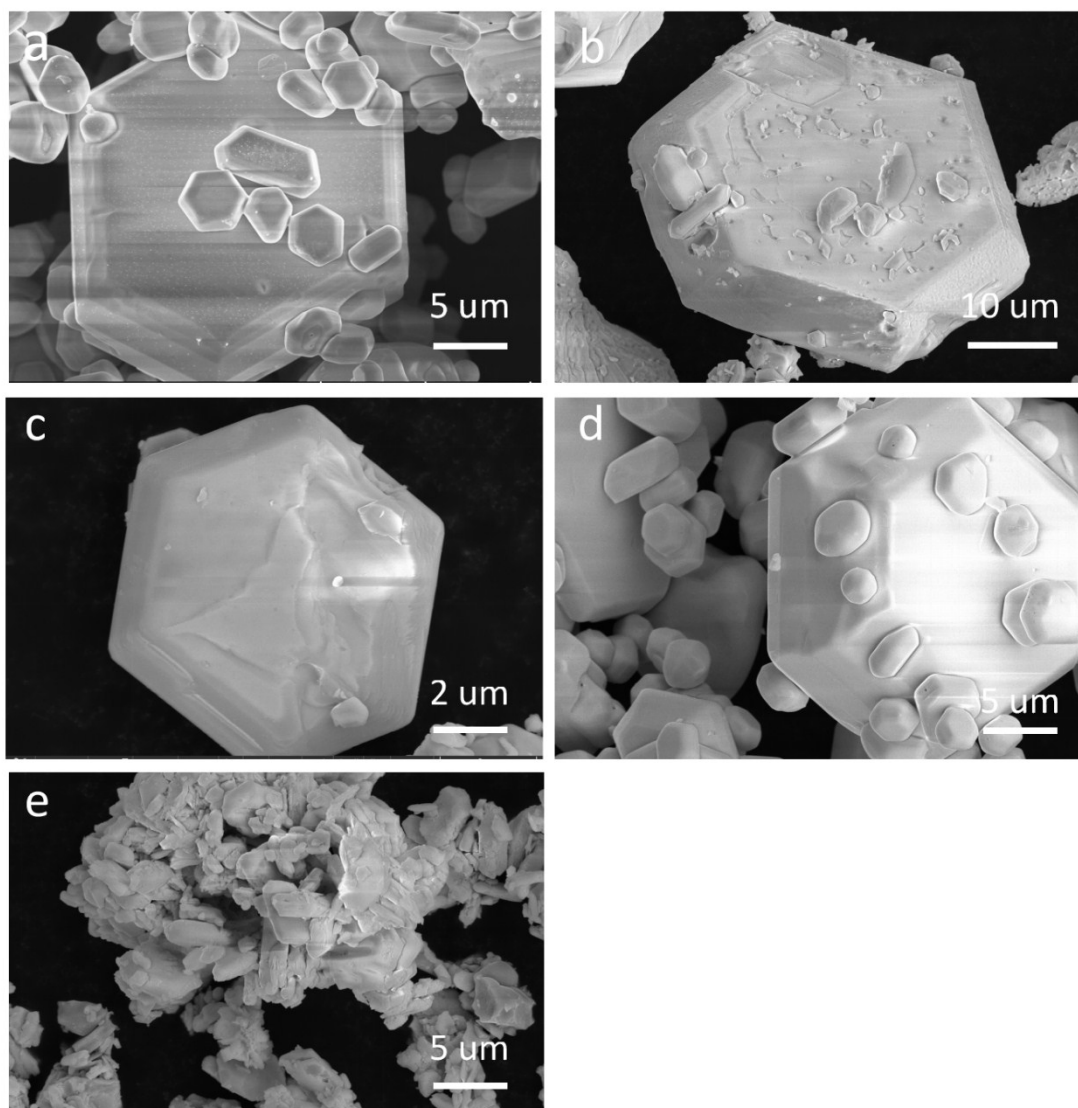

Figure S2. SEM images and of  $\text{Cs}_3\text{Bi}_{2-x}\text{Ru}_x\text{I}_9$ . (a)  $x = 0$ ; (b)  $x = 0.02$ ; (c)  $x = 0.04$ ; (d)  $x = 0.1$ ; (e)  $x = 0.2$ .

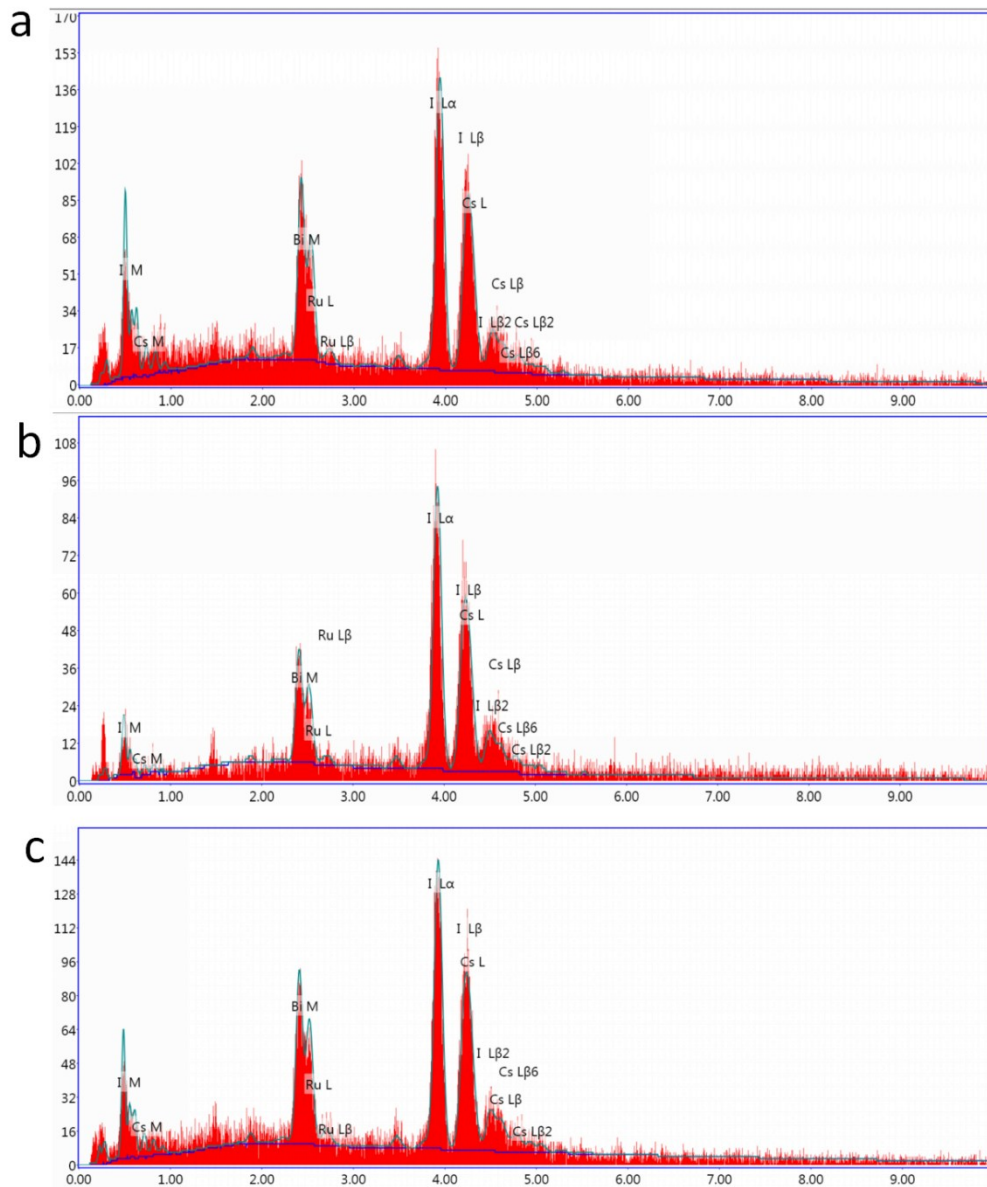

Figure S3. EDAX of  $\text{Cs}_3\text{Bi}_{2-x}\text{Ru}_x\text{I}_9$ . (a)  $x = 0.02$ ; (b)  $x = 0.04$ ; (c)  $x = 0.1$ .

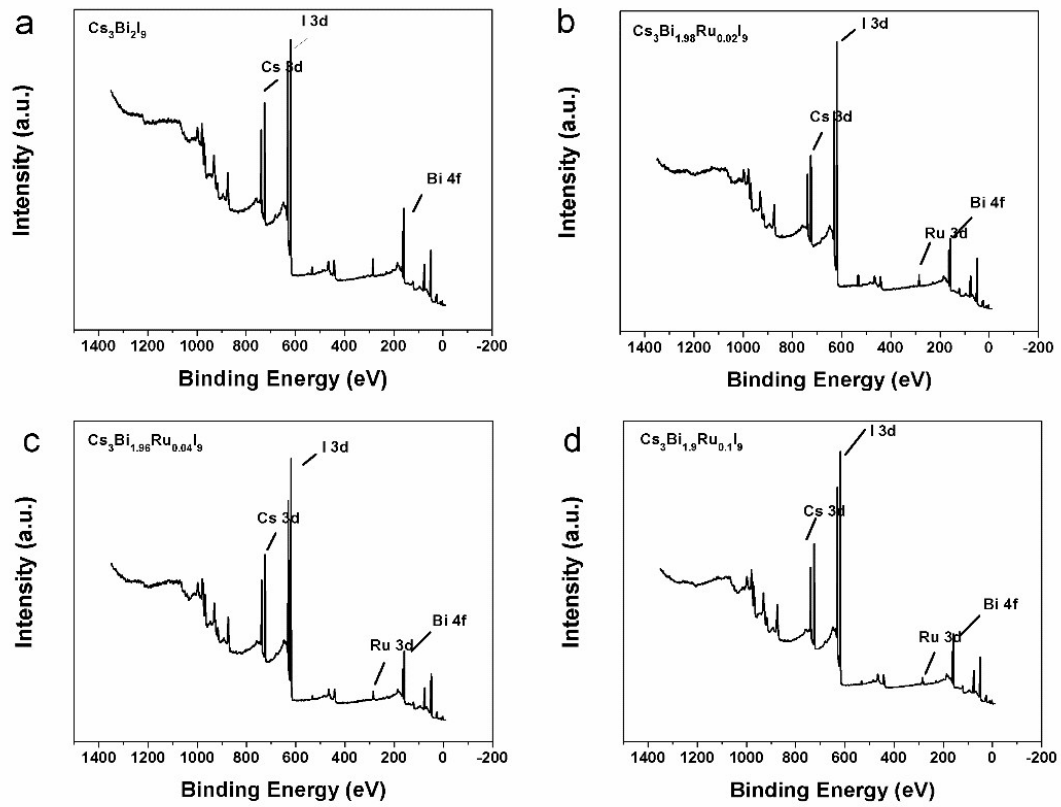

Figure S4. XPS Survey Spectra of Cs<sub>3</sub>Bi<sub>2</sub>I<sub>9</sub> and Cs<sub>3</sub>Bi<sub>2-x</sub>Ru<sub>x</sub>I<sub>9</sub>.  
 (a) Cs<sub>3</sub>Bi<sub>2</sub>I<sub>9</sub>; (b) Cs<sub>3</sub>Bi<sub>1.98</sub>Ru<sub>0.02</sub>I<sub>9</sub>; (c) Cs<sub>3</sub>Bi<sub>1.96</sub>Ru<sub>0.04</sub>I<sub>9</sub>; (d) Cs<sub>3</sub>Bi<sub>1.9</sub>Ru<sub>0.1</sub>I<sub>9</sub>.

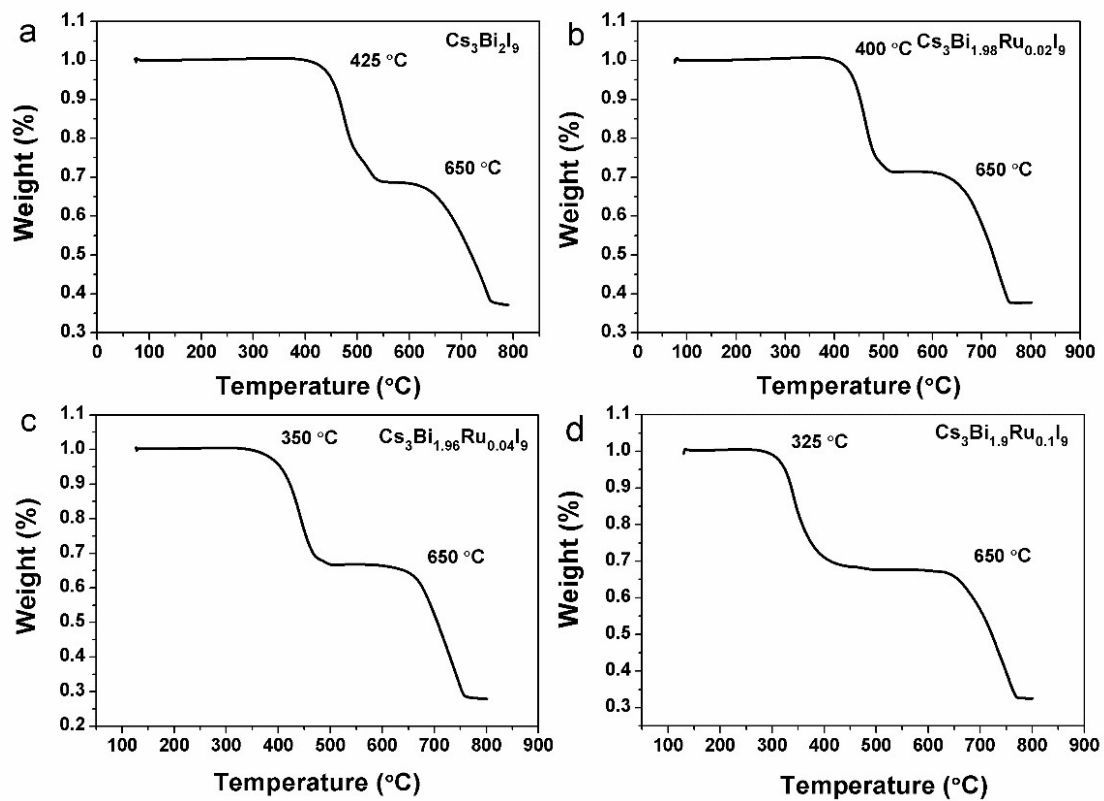

Figure S5. TG curves of  $\text{Cs}_3\text{Bi}_2\text{I}_9$  and  $\text{Cs}_3\text{Bi}_{2-x}\text{Ru}_x\text{I}_9$ .  
 (a)  $\text{Cs}_3\text{Bi}_2\text{I}_9$ ; (b)  $\text{Cs}_3\text{Bi}_{1.98}\text{Ru}_{0.02}\text{I}_9$ ; (c)  $\text{Cs}_3\text{Bi}_{1.96}\text{Ru}_{0.04}\text{I}_9$ ; (d)  $\text{Cs}_3\text{Bi}_{1.9}\text{Ru}_{0.1}\text{I}_9$ .

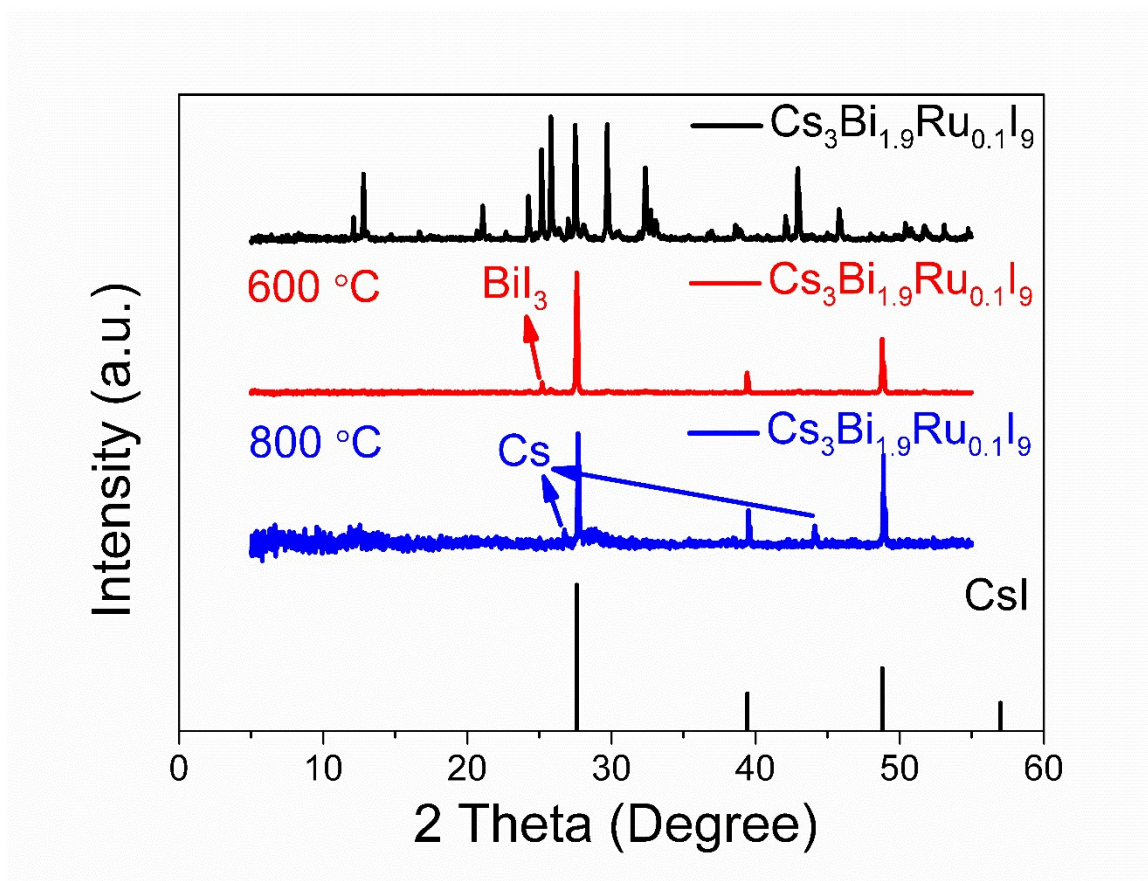

Figure S6. XRD of  $\text{Cs}_3\text{Bi}_{1.9}\text{Ru}_{0.1}\text{I}_9$  after heating at 600 °C and 800 °C.

Table 1. Elemental analysis by ICP-AES for  $\text{Cs}_3\text{Bi}_{2-x}\text{Ru}_x\text{I}_9$

| Samples of $\text{Cs}_3\text{Bi}_{2-x}\text{Ru}_x\text{I}_9$ | X = 0 | X = 0.02 | X = 0.04 | X = 0.1 |
|--------------------------------------------------------------|-------|----------|----------|---------|
| Theoretical doping level                                     | 0     | 1%       | 2%       | 5%      |
| Actual doping level by ICP-AES (%)                           | 0     | 0.9%     | 1.9%     | 4.3%    |
